# Supplementary material
Source: PubMed Central journal article supplement (PMC3540122)
Supplement: NIHMS427803-supplement-01.pdf [file NIHMS427803-supplement-01.pdf]

C-terminal turn stability determines assembly differences between A $\beta$ 40 and A $\beta$ 42

Supplementary Material

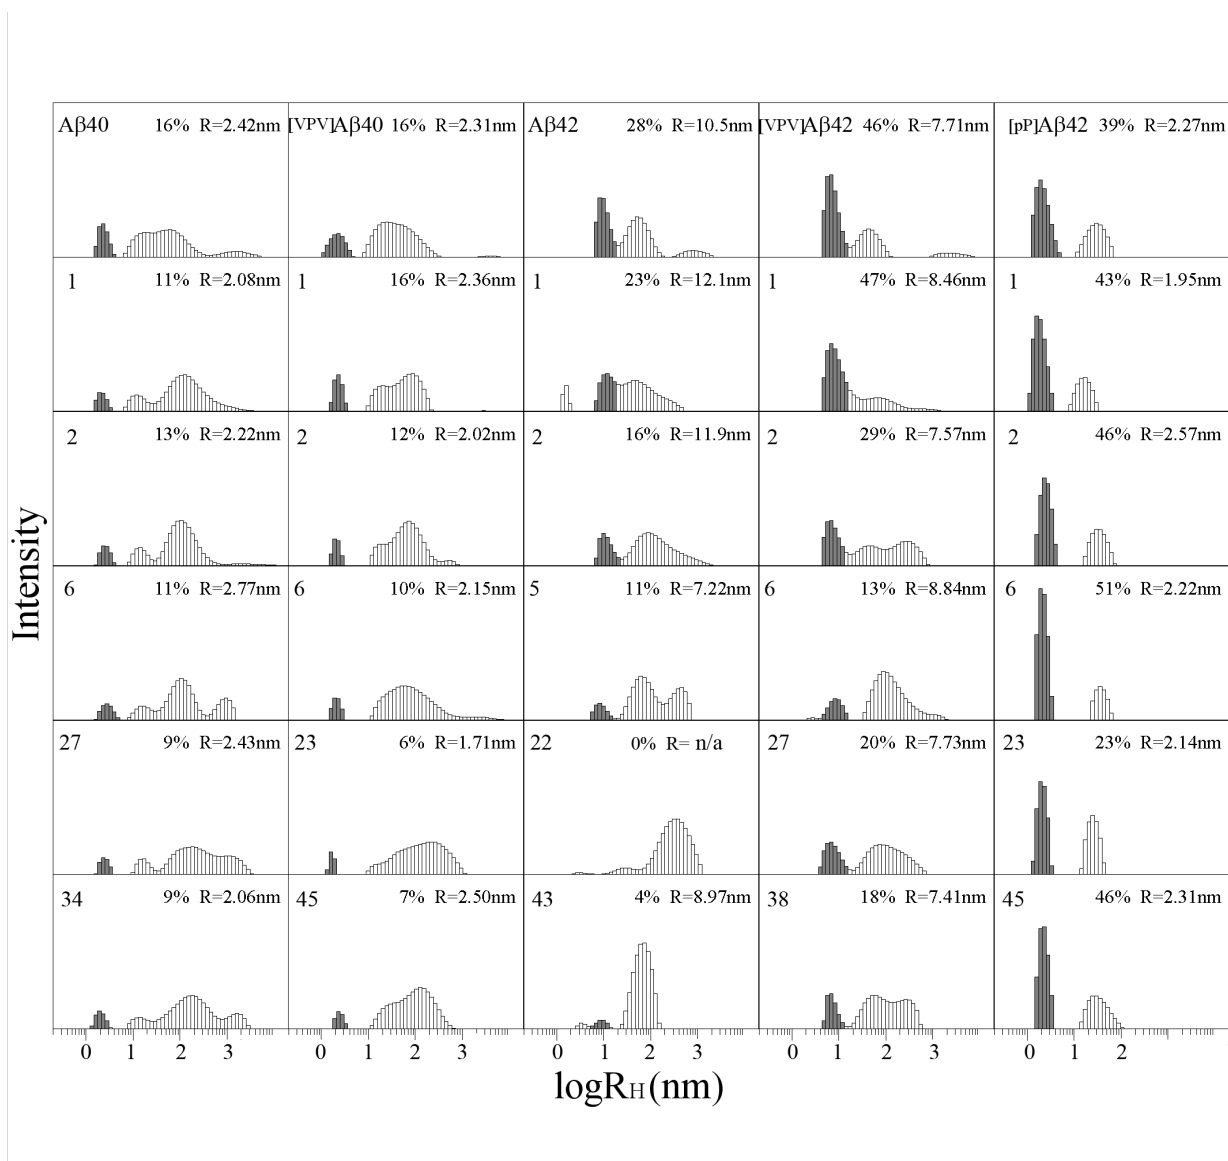

Figure S1: The temporal evolution of the size distribution of A $\beta$  peptides monitored by DLS. Each column of panels represents data for a single peptide. The first row of panels show representative distributions observed immediately after sample preparation. All other panels show representative distributions observed on the day of incubation indicated in the top left corner of the panel. The distributions are normalized and each bar in the histogram represents the fraction of the scattering intensity produced by particles with a particular hydrodynamic radius ( $R_H$ ) (indicated on a logarithmic scale at the bottom). The oligomer fractions are shaded dark gray. The relative contribution of these highlighted fractions to the scattering intensity and its average  $R_H$  is shown in each panel.
